# Supplementary material for: Insights into the Structural Conformations of the Tau Protein in Different Aggregation Status
Source: MDPI journal article supplement (doi:10.3390/molecules28114544), 2023-06-04
Supplement: s1 [file s1]

# SUPPORTING INFORMATION

## Insights into the structural conformations of the tau protein in different aggregation status

**Luca Pinzi,<sup>1†</sup> Nicolò Bisi,<sup>2†</sup> Claudia Sorbi,<sup>1</sup> Silvia Franchini,<sup>1</sup> Nicolò Tonali<sup>2</sup> and Giulio Rastelli<sup>1,\*</sup>**

<sup>1</sup> Department of Life Sciences, University of Modena and Reggio Emilia, Via Giuseppe Campi 103, 41125 Modena, Italy; giulio.rastelli@unimore.it (G.R.); silvia.franchini@unimore.it (S.F.); claudia.sorbi@unimore.it (C.S.); luca.pinzi@unimore.it (L.P.).

<sup>2</sup> Université de Paris-Saclay, CNRS, BioCIS, Bat. Henri Moissan17, av. des Sciences, 91400, Orsay, France; nicolo.tonali@universite-paris-saclay.fr (N.T.); bisinicolo@gmail.com (N.B.).

<sup>†</sup> Equally contributing authors

<sup>\*</sup> Correspondence: giulio.rastelli@unimore.it; Tel.: +39-059-2058564

# Table of Contents

## Tables

Table S1

S3

**Table S1:** Structures of Tau reported within the Protein Data Bank. The structures are classified based on the presence of co-crystallized elements with Tau, and on the conformation and structural features of Tau in the complex. The percentages of bending residues, and of residues framed into alpha helices, beta strands and non-defined secondary structures are reported. Moreover, the percentage of Tau residues involved in hydrogen-bond interactions with other filaments of the same proteins in the complex are also reported. The percentages herein reported have been evaluated by means of an in house developed python script the BioPython (DOI: 10.1093/bioinformatics/btp163) and Pandas (DOI: 10.25080/Majora-92bf1922-00a) libraries. Numbering of the initial (“Start ResID”) and final (“Stop ResID”) residues of Tau sequences refers to those of their respective PDB complexes.

| Title | Type of Structure | Class                   | Sequence length | % of bending residues | % of residues in alpha helics | % of residues in beta strands | % of residues in non-defined secondary structures | % of residues involved in H-bonds | Start ResID | Stop ResID |
|-------|-------------------|-------------------------|-----------------|-----------------------|-------------------------------|-------------------------------|---------------------------------------------------|-----------------------------------|-------------|------------|
| 7P6D  | 4R                | AGD type 1              | 115.0           | 8.7                   | 0.0                           | 53.0                          | 38.3                                              | 75.1                              | GLY273      | ASP387     |
| 7P6E  | 4R                | AGD type 2              | 108.0           | 7.4                   | 0.0                           | 27.6                          | 65.0                                              | 77.1                              | LYS274      | ASN381     |
| 6TJX  | 4R                | CBD tau fibrils doublet | 107.0           | 11.2                  | 0.0                           | 40.2                          | 48.6                                              | 0.0                               | LYS274      | GLU380     |
| 6VH7  | 4R                | CBD tau fibrils doublet | 107.0           | 3.7                   | 0.0                           | 74.8                          | 21.5                                              | 0.0                               | LYS274      | GLU380     |
| 6TJO  | 4R                | CDB tau fibrils singlet | 107.0           | 7.5                   | 0.0                           | 15.9                          | 76.6                                              | 0.0                               | LYS274      | GLU380     |
| 6VHA  | 4R                | CDB tau fibrils singlet | 107.0           | 3.7                   | 0.0                           | 74.8                          | 21.5                                              | 0.0                               | LYS274      | GLU380     |
| 6NWP  | 4R – 3R           | CTE I                   | 75.0            | 6.9                   | 0.0                           | 66.0                          | 27.1                                              | 74.7                              | SER305      | ARG379     |
| 8BYN  | 4R – 3R           | CTE I                   | 75.0            | 9.3                   | 0.0                           | 61.3                          | 29.4                                              | 75.1                              | SER305      | ARG379     |
| 7QL1  | 4R – 3R           | CTE I/II                | 73.0            | 11.0                  | 0.0                           | 47.9                          | 41.1                                              | 76.7                              | VAL306      | PHE378     |
| 6NWQ  | 4R – 3R           | CTE II                  | 75.0            | 9.3                   | 0.0                           | 27.6                          | 63.1                                              | 31.3                              | SER305      | ARG379     |
| 7QJW  | 4R – 3R           | CTE II                  | 75.0            | 8.0                   | 0.0                           | 58.7                          | 33.3                                              | 79.5                              | SER305      | ARG379     |
| 7QKX  | 4R – 3R           | CTE II                  | 73.0            | 10.1                  | 0.0                           | 61.6                          | 28.3                                              | 76.5                              | VAL306      | PHE378     |
| 7QL0  | 4R – 3R           | CTE II                  | 69.0            | 7.7                   | 0.0                           | 51.4                          | 40.9                                              | 77.8                              | VAL309      | THR377     |
| 7QL3  | 4R – 3R           | CTE III                 | 71.0            | 7.0                   | 0.0                           | 46.5                          | 46.5                                              | 77.0                              | ILE308      | PHE378     |
| 7QK5  | 4R (266/297–391)  | CTE-like fold           | 74.0            | 7.2                   | 0.0                           | 64.9                          | 27.9                                              | 76.7                              | VAL306      | ARG379     |
| 7QKV  | 4R (266/297–391)  | CTE-like fold           | 69.0            | 7.2                   | 0.0                           | 52.2                          | 40.6                                              | 78.4                              | VAL309      | THR377     |
| 7P66  | 4R                | GGT I                   | 108.0           | 7.4                   | 0.0                           | 55.2                          | 37.4                                              | 75.8                              | GLY272      | ARG379     |

|      |                                             |                            |       |      |     |      |      |      |        |        |
|------|---------------------------------------------|----------------------------|-------|------|-----|------|------|------|--------|--------|
| 7P67 | 4R                                          | GGT II                     | 108.0 | 7.4  | 0.0 | 56.3 | 36.3 | 83.5 | GLY272 | ARG379 |
| 7P68 | 4R                                          | GGT III                    | 108.0 | 6.5  | 0.0 | 56.0 | 37.5 | 79.8 | GLY272 | ARG379 |
| 7QK3 | 4R (258–391)                                | GGT-like fold              | 61.0  | 4.9  | 0.0 | 50.8 | 44.3 | 77.6 | PRO270 | HIS330 |
| 7QK6 | 4R (258–391)                                | GGT-like fold              | 54.0  | 3.7  | 0.0 | 55.0 | 41.3 | 79.6 | VAL275 | ILE328 |
| 7QKG | 4R (258–391)                                | GGT-like fold              | 54.0  | 7.4  | 0.0 | 46.3 | 46.3 | 79.0 | VAL275 | ILE328 |
| 7P6A | 4R                                          | GPT type 1a                | 108.0 | 6.5  | 0.0 | 62.0 | 31.5 | 82.6 | GLY272 | ARG379 |
| 7P6B | 4R                                          | GPT type 1b                | 108.0 | 8.3  | 0.0 | 63.0 | 28.7 | 82.8 | GLY272 | ARG379 |
| 7P6C | 4R                                          | GPT type 2                 | 108.0 | 8.3  | 0.0 | 61.1 | 30.6 | 84.0 | GLY272 | ARG379 |
| 6QJQ | 3R                                          | Heparin-induced 3R         | 58.0  | 0.0  | 0.0 | 26.8 | 73.3 | 0.0  | GLY272 | HIS330 |
| 6QJP | 4R                                          | Heparin-induced 4R jagged  | 48.0  | 0.0  | 0.0 | 52.1 | 47.9 | 0.0  | LYS274 | LYS321 |
| 6QJH | 4R                                          | Heparin-induced 4R snake   | 59.0  | 10.2 | 0.0 | 54.2 | 35.6 | 0.0  | GLY272 | HIS330 |
| 6QJM | 4R                                          | Heparin-induced 4R twister | 48.0  | 0.0  | 0.0 | 45.8 | 54.2 | 0.0  | LYS274 | LYS321 |
| 6CVJ | Tau fragment in complex with other proteins | Model of synthetic Tau     | 12.0  | 8.3  | 0.0 | 0.0  | 91.7 | 66.7 | VAL256 | LYS267 |
| 6CVN | Tau fragment in complex with other proteins | Model of synthetic Tau     | 27.0  | 3.7  | 0.0 | 0.0  | 96.3 | 70.4 | LYS274 | VAL300 |
| 7QJY | 4R (266/297–391)                            | new I                      | 75.0  | 6.9  | 0.0 | 55.6 | 37.5 | 75.1 | SER305 | ARG379 |
| 7R4T | 4R (266/297–391)                            | new I                      | 76.0  | 10.9 | 0.0 | 61.2 | 27.9 | 75.4 | GLY304 | ARG379 |
| 7QJZ | 4R (266/297–391)                            | new II                     | 74.0  | 7.0  | 0.0 | 41.0 | 52.0 | 79.7 | SER305 | PHE378 |
| 7QK2 | 4R (300–391)                                | new III                    | 71.0  | 11.5 | 0.0 | 60.6 | 27.9 | 75.1 | ILE308 | PHE378 |
| 7QKZ | 4R (305–379)                                | new III                    | 11.0  | 6.1  | 0.0 | 45.5 | 48.4 | 78.8 | GLN307 | LYS317 |
| 7QKL | 4R (266/297–391)                            | new IIX                    | 76.0  | 6.6  | 0.0 | 68.4 | 25.0 | 75.7 | GLY304 | ARG379 |
| 7QKF | 4R (266/297–391)                            | new IV                     | 41.5  | 7.4  | 0.0 | 53.9 | 38.7 | 73.5 | VAL309 | ILE360 |
| 7QKM | 4R (266–391. S356D)                         | new IX                     | 55.0  | 12.7 | 0.0 | 52.7 | 34.6 | 78.5 | LYS274 | ILE328 |
| 7QKH | 4R (258–391)                                | new V                      | 34.0  | 7.8  | 0.0 | 37.3 | 54.9 | 69.6 | ILE277 | TYR310 |
| 7QKI | 4R (297–408)                                | new VI                     | 76.0  | 7.0  | 0.0 | 52.9 | 40.1 | 76.1 | GLY304 | ARG379 |
| 7QKJ | 4R (266/297–391)                            | new VII                    | 75.0  | 10.7 | 0.0 | 49.8 | 39.5 | 80.5 | SER305 | ARG379 |
| 7QKU | 4R (266/297–391)                            | new X                      | 75.5  | 7.3  | 0.0 | 61.8 | 30.9 | 78.2 | GLY304 | ARG379 |
| 7QKW | 4R (266–391. S356D)                         | new XI                     | 51.0  | 8.7  | 0.0 | 55.7 | 35.7 | 77.4 | VAL275 | ILE328 |

|                   |                                             |                                                     |       |      |      |      |       |      |        |        |
|-------------------|---------------------------------------------|-----------------------------------------------------|-------|------|------|------|-------|------|--------|--------|
| 7QKY              | 0N4R                                        | new XII                                             | 66.0  | 15.2 | 0.0  | 59.1 | 25.7  | 77.6 | LEU376 | LEU441 |
| 7QL2              | 4R (266/297–391)                            | new XIII                                            | 50.0  | 4.0  | 0.0  | 68.7 | 27.3  | 74.7 | VAL275 | SER324 |
| 7R5H              | 4R (266/297–391)                            | new XIV                                             | 79.5  | 7.6  | 0.0  | 64.2 | 28.2  | 72.1 | SER305 | HIS388 |
| 7P65              | 4R                                          | PSP                                                 | 110.0 | 14.5 | 0.0  | 53.6 | 31.9  | 81.1 | GLY272 | ASN381 |
| 7U0Z              | 4R                                          | PSP                                                 | 110.0 | 11.8 | 0.0  | 50.9 | 37.3  | 66.1 | GLY272 | ASN381 |
| 7KQK (chains ABC) | Tau fragment in complex with other proteins | pTau fragment in complex with anti-pTau C21-ABS Fab | 10.0  | 0.0  | 0.0  | 0.0  | 100.0 | 0.0  | LYS224 | PRO233 |
| 7KQK (chains HLP) | Tau fragment in complex with other proteins | pTau fragment in complex with anti-pTau C21-ABS Fab | 10.0  | 0.0  | 0.0  | 0.0  | 100.0 | 0.0  | LYS224 | PRO233 |
| 2MZ7              | Tau fragment in complex with other proteins | Tau bound to Microtubules                           | 46.0  | 28.3 | 21.7 | 0.0  | 50.0  | 0.0  | LYS267 | PRO312 |
| 7PQC              | Tau fragment in complex with other proteins | Tau bound to Microtubules                           | 194.0 | 10.8 | 5.7  | 0.0  | 83.5  | 0.0  | SER202 | LYS395 |
| 7PQP              | Tau fragment in complex with other proteins | Tau bound to Microtubules                           | 194.0 | 13.4 | 6.2  | 0.0  | 80.4  | 0.0  | SER202 | LYS395 |
| 5O3L              | 4R – 3R                                     | Tau fibril from Alzheimer's Disease - PHF           | 73.0  | 5.5  | 0.0  | 19.2 | 75.3  | 69.6 | VAL306 | PHE378 |
| 5O3O              | 4R – 3R                                     | Tau fibril from Alzheimer's Disease - PHF           | 73.0  | 8.2  | 0.0  | 42.5 | 49.3  | 79.9 | VAL306 | PHE378 |
| 6HRE              | 4R – 3R                                     | Tau fibril from Alzheimer's Disease - PHF           | 77.0  | 5.2  | 0.0  | 53.2 | 41.6  | 68.6 | GLY304 | GLU380 |
| 6VHL              | 4R – 3R                                     | Tau fibril from Alzheimer's Disease - PHF           | 99.0  | 9.1  | 0.0  | 0.0  | 90.9  | 0.0  | GLY304 | GLY402 |
| 7MKF              | 4R – 3R                                     | Tau fibril from Alzheimer's Disease - PHF           | 73.0  | 6.2  | 0.0  | 62.4 | 31.5  | 87.4 | VAL306 | PHE378 |
| 7MKH              | 4R – 3R                                     | Tau fibril from Alzheimer's Disease - PHF           | 75.0  | 7.4  | 0.0  | 60.0 | 32.7  | 86.3 | SER305 | ARG379 |
| 7NRQ              | 4R – 3R                                     | Tau fibril from Alzheimer's Disease - PHF           | 77.0  | 6.5  | 0.0  | 46.8 | 46.7  | 81.3 | GLY304 | GLU380 |
| 7NRV              | 4R – 3R                                     | Tau fibril from Alzheimer's Disease - PHF           | 77.0  | 3.9  | 0.0  | 51.2 | 44.9  | 81.9 | GLY304 | GLU380 |
| 7QJV              | 4R – 3R                                     | Tau fibril from Alzheimer's Disease - PHF           | 75.0  | 8.7  | 0.0  | 61.6 | 29.8  | 76.6 | GLY304 | PHE378 |
| 7QJX              | 4R – 3R                                     | Tau fibril from Alzheimer's Disease - PHF           | 75.0  | 4.2  | 0.0  | 69.7 | 26.1  | 75.0 | GLY304 | PHE378 |
| 7QK1              | 4R – 3R                                     | Tau fibril from Alzheimer's Disease - PHF           | 75.0  | 7.8  | 0.0  | 60.5 | 31.8  | 76.7 | SER305 | ARG379 |

|      |                                             |                                           |       |      |     |      |       |      |        |        |
|------|---------------------------------------------|-------------------------------------------|-------|------|-----|------|-------|------|--------|--------|
| 7QKK | 4R – 3R                                     | Tau fibril from Alzheimer's Disease - PHF | 76.0  | 6.6  | 0.0 | 47.8 | 45.6  | 70.6 | GLY304 | ARG379 |
| 7QL4 | 4R – 3R                                     | Tau fibril from Alzheimer's Disease - PHF | 76.0  | 7.9  | 0.0 | 63.2 | 28.9  | 76.8 | GLY304 | ARG379 |
| 7UPE | 4R – 3R                                     | Tau fibril from Alzheimer's Disease - PHF | 74.0  | 5.4  | 0.0 | 71.6 | 23.0  | 81.5 | VAL306 | ARG379 |
| 7UPF | 4R – 3R                                     | Tau fibril from Alzheimer's Disease - PHF | 74.0  | 5.4  | 0.0 | 71.6 | 23.0  | 81.5 | VAL306 | ARG379 |
| 7UPG | 4R – 3R                                     | Tau fibril from Alzheimer's Disease - PHF | 75.0  | 5.3  | 0.0 | 62.7 | 32.0  | 81.2 | SER305 | ARG379 |
| 7YMN | 3R (266-391)                                | Tau fibril from Alzheimer's Disease - PHF | 76.0  | 5.3  | 0.0 | 13.2 | 81.5  | 61.2 | GLY304 | ARG379 |
| 5O3T | 4R – 3R                                     | Tau fibril from Alzheimer's Disease - SF  | 73.0  | 9.6  | 0.0 | 17.1 | 73.3  | 64.7 | VAL306 | PHE378 |
| 6HRF | 4R – 3R                                     | Tau fibril from Alzheimer's Disease - SF  | 77.0  | 9.1  | 0.0 | 42.9 | 48.0  | 62.5 | GLY304 | GLU380 |
| 6VI3 | 4R – 3R                                     | Tau fibril from Alzheimer's Disease - SF  | 98.0  | 6.1  | 0.0 | 0.0  | 93.9  | 0.0  | GLY304 | GLY401 |
| 7MKG | 4R – 3R                                     | Tau fibril from Alzheimer's Disease - SF  | 73.0  | 6.2  | 0.0 | 64.4 | 29.5  | 84.5 | VAL306 | PHE378 |
| 7NRS | 4R – 3R                                     | Tau fibril from Alzheimer's Disease - SF  | 77.0  | 9.1  | 0.0 | 42.9 | 48.0  | 62.5 | GLY304 | GLU380 |
| 7NRT | 4R – 3R                                     | Tau fibril from Alzheimer's Disease - SF  | 77.0  | 3.9  | 0.0 | 57.8 | 38.4  | 80.0 | GLY304 | GLU380 |
| 7NRX | 4R – 3R                                     | Tau fibril from Alzheimer's Disease - SF  | 77.0  | 7.8  | 0.0 | 36.9 | 55.3  | 79.3 | GLY304 | GLU380 |
| 6GX5 | 3R                                          | Tau fibril from PICK's Disease - NPF      | 125.0 | 8.0  | 0.0 | 48.8 | 43.2  | 55.7 | LYS254 | PHE378 |
| 7YPG | 3R                                          | Spindle-like fibril                       | 59.0  | 5.1  | 0.0 | 27.1 | 67.8  | 66.1 | GLY304 | HIS362 |
| 4FL5 | Tau fragment in complex with other proteins | Tau fragment in complex with 14-3-3       | 6.5   | 10.0 | 6.3 | 0.0  | 83.8  | 0.0  | ARG211 | PRO218 |
| 4Y32 | Tau fragment in complex with other proteins | Tau fragment in complex with 14-3-3       | 6.5   | 0.0  | 0.0 | 0.0  | 100.0 | 0.0  | ARG211 | THR217 |
| 4Y3B | Tau fragment in complex with other proteins | Tau fragment in complex with 14-3-3       | 6.5   | 8.4  | 0.0 | 0.0  | 91.7  | 0.0  | ARG211 | THR217 |
| 4Y5I | Tau fragment in complex with other proteins | Tau fragment in complex with 14-3-3       | 6.5   | 8.4  | 0.0 | 0.0  | 91.7  | 0.0  | ARG2   | THR8   |
| 5BTV | Tau fragment in complex with other proteins | Tau fragment in complex with 14-3-3       | 4.0   | 0.0  | 0.0 | 0.0  | 100.0 | 0.0  | GLY323 | GLY326 |
| 5HF3 | Tau fragment in complex with other proteins | Tau fragment in complex with 14-3-3       | 7.0   | 0.0  | 0.0 | 0.0  | 100.0 | 0.0  | ARG2   | THR8   |

|                   |                                             |                                         |      |      |      |     |       |     |        |        |
|-------------------|---------------------------------------------|-----------------------------------------|------|------|------|-----|-------|-----|--------|--------|
| 6FAU              | Tau fragment in complex with other proteins | Tau fragment in complex with 14-3-3     | 6.5  | 0.0  | 0.0  | 0.0 | 100.0 | 0.0 | ARG2   | GLY8   |
| 6FAV              | Tau fragment in complex with other proteins | Tau fragment in complex with 14-3-3     | 6.5  | 0.0  | 0.0  | 0.0 | 100.0 | 0.0 | ARG2   | GLY8   |
| 6FAW              | Tau fragment in complex with other proteins | Tau fragment in complex with 14-3-3     | 6.5  | 0.0  | 0.0  | 0.0 | 100.0 | 0.0 | ARG2   | GLY8   |
| 6FBW              | Tau fragment in complex with other proteins | Tau fragment in complex with 14-3-3     | 6.5  | 0.0  | 0.0  | 0.0 | 100.0 | 0.0 | ARG2   | GLY8   |
| 6FBY              | Tau fragment in complex with other proteins | Tau fragment in complex with 14-3-3     | 6.5  | 0.0  | 0.0  | 0.0 | 100.0 | 0.0 | ARG2   | GLY8   |
| 6FI4              | Tau fragment in complex with other proteins | Tau fragment in complex with 14-3-3     | 4.0  | 0.0  | 0.0  | 0.0 | 100.0 | 0.0 | PRO4   | PRO7   |
| 6FI5              | Tau fragment in complex with other proteins | Tau fragment in complex with 14-3-3     | 5.0  | 0.0  | 0.0  | 0.0 | 100.0 | 0.0 | THR3   | PRO7   |
| 7EYC (chains ABQ) | Tau fragment in complex with other proteins | Tau fragment in complex with antigen    | 8.0  | 0.0  | 0.0  | 0.0 | 100.0 | 0.0 | ILE3   | LEU10  |
| 7EYC (chains LHP) | Tau fragment in complex with other proteins | Tau fragment in complex with antigen    | 8.0  | 0.0  | 0.0  | 0.0 | 100.0 | 0.0 | ILE3   | LEU10  |
| 5ZIA (chains ABC) | Tau fragment in complex with other proteins | Tau fragment in complex with CBTAU-24.1 | 9.0  | 0.0  | 0.0  | 0.0 | 100.0 | 0.0 | SER235 | LEU243 |
| 5ZIA (chains DEF) | Tau fragment in complex with other proteins | Tau fragment in complex with CBTAU-24.1 | 9.0  | 0.0  | 0.0  | 0.0 | 100.0 | 0.0 | SER235 | LEU243 |
| 5ZIA (chains GLR) | Tau fragment in complex with other proteins | Tau fragment in complex with CBTAU-24.1 | 9.0  | 0.0  | 0.0  | 0.0 | 100.0 | 0.0 | SER235 | LEU243 |
| 5ZIA (chains HIJ) | Tau fragment in complex with other proteins | Tau fragment in complex with CBTAU-24.1 | 9.0  | 0.0  | 0.0  | 0.0 | 100.0 | 0.0 | SER235 | LEU243 |
| 5ZIA (chains KMN) | Tau fragment in complex with other proteins | Tau fragment in complex with CBTAU-24.1 | 9.0  | 0.0  | 0.0  | 0.0 | 100.0 | 0.0 | SER235 | LEU243 |
| 5ZIA (chains OPQ) | Tau fragment in complex with other proteins | Tau fragment in complex with CBTAU-24.1 | 9.0  | 0.0  | 0.0  | 0.0 | 100.0 | 0.0 | SER235 | LEU243 |
| 5ZV3              | Tau fragment in complex with other proteins | Tau fragment in complex with CBTAU-24.1 | 12.0 | 0.0  | 25.0 | 0.0 | 75.0  | 0.0 | GLU57  | SER68  |
| 6GK7              | Tau fragment in complex with other proteins | Tau fragment in complex with CBTAU-27.1 | 11.0 | 9.1  | 0.0  | 0.0 | 90.9  | 0.0 | ILE308 | VAL318 |
| 6GK8              | Tau fragment in complex with other proteins | Tau fragment in complex with CBTAU-28.1 | 13.0 | 7.7  | 0.0  | 0.0 | 92.3  | 0.0 | GLU57  | THR69  |
| 5N5A              | Tau fragment in complex with other proteins | Tau fragment in complex with F-actin    | 37.0 | 16.2 | 45.9 | 0.0 | 37.9  | 0.0 | LYS254 | LYS290 |

|                   |                                             |                                      |      |      |      |     |       |     |        |        |
|-------------------|---------------------------------------------|--------------------------------------|------|------|------|-----|-------|-----|--------|--------|
| 5N5B              | Tau fragment in complex with other proteins | Tau fragment in complex with F-actin | 28.0 | 21.4 | 17.9 | 0.0 | 60.7  | 0.0 | GLY292 | THR319 |
| 5NVB              | Tau fragment in complex with other proteins | Tau fragment in complex with F-actin | 15.0 | 13.3 | 26.7 | 0.0 | 60.0  | 0.0 | LYS254 | HIS268 |
| 4GLR (chains AHI) | Tau fragment in complex with other proteins | Tau fragment in complex with Fab     | 10.0 | 0.0  | 0.0  | 0.0 | 100.0 | 0.0 | LYS225 | LYS234 |
| 4GLR (chains BJK) | Tau fragment in complex with other proteins | Tau fragment in complex with Fab     | 10.0 | 0.0  | 0.0  | 0.0 | 100.0 | 0.0 | LYS225 | LYS234 |
| 4TQE              | Tau fragment in complex with other proteins | Tau fragment in complex with Fab     | 16.0 | 12.5 | 0.0  | 0.0 | 87.5  | 0.0 | LEU215 | ARG230 |
| 5DMG (chains CDZ) | Tau fragment in complex with other proteins | Tau fragment in complex with Fab     | 9.0  | 0.0  | 0.0  | 0.0 | 100.0 | 0.0 | VAL420 | LEU428 |
| 5DMG (chains EFX) | Tau fragment in complex with other proteins | Tau fragment in complex with Fab     | 9.0  | 0.0  | 0.0  | 0.0 | 100.0 | 0.0 | VAL420 | LEU428 |
| 5DMG (chains HLP) | Tau fragment in complex with other proteins | Tau fragment in complex with Fab     | 9.0  | 0.0  | 0.0  | 0.0 | 100.0 | 0.0 | VAL420 | LEU428 |
| 5E2V              | Tau fragment in complex with other proteins | Tau fragment in complex with Fab     | 9.0  | 22.2 | 0.0  | 0.0 | 77.8  | 0.0 | GLY201 | ARG209 |
| 5E2W              | Tau fragment in complex with other proteins | Tau fragment in complex with Fab     | 7.0  | 14.3 | 0.0  | 0.0 | 85.7  | 0.0 | PRO203 | ARG209 |
| 5MO3              | Tau fragment in complex with other proteins | Tau fragment in complex with Fab     | 8.0  | 25.0 | 0.0  | 0.0 | 75.0  | 0.0 | LYS298 | SER305 |
| 5MP1 (chains AHL) | Tau fragment in complex with other proteins | Tau fragment in complex with Fab     | 7.0  | 0.0  | 0.0  | 0.0 | 100.0 | 0.0 | HIS299 | SER305 |
| 5MP1 (chains BCD) | Tau fragment in complex with other proteins | Tau fragment in complex with Fab     | 7.0  | 0.0  | 0.0  | 0.0 | 100.0 | 0.0 | HIS299 | SER305 |
| 5MP1 (chains EFG) | Tau fragment in complex with other proteins | Tau fragment in complex with Fab     | 7.0  | 0.0  | 0.0  | 0.0 | 100.0 | 0.0 | HIS299 | SER305 |
| 5MP1 (chains IJK) | Tau fragment in complex with other proteins | Tau fragment in complex with Fab     | 7.0  | 0.0  | 0.0  | 0.0 | 100.0 | 0.0 | HIS299 | SER305 |
| 5MP3 (chains ABC) | Tau fragment in complex with other proteins | Tau fragment in complex with Fab     | 9.0  | 0.0  | 0.0  | 0.0 | 100.0 | 0.0 | LYS298 | VAL306 |
| 5MP3 (chains DHL) | Tau fragment in complex with other proteins | Tau fragment in complex with Fab     | 9.0  | 0.0  | 0.0  | 0.0 | 100.0 | 0.0 | LYS298 | VAL306 |
| 5MP5 (chains ABK) | Tau fragment in complex with other proteins | Tau fragment in complex with Fab     | 7.0  | 0.0  | 0.0  | 0.0 | 100.0 | 0.0 | HIS299 | SER305 |



|                   |                                             |                                             |      |     |     |     |       |     |        |        |
|-------------------|---------------------------------------------|---------------------------------------------|------|-----|-----|-----|-------|-----|--------|--------|
| 5MP5 (chains CD)  | Tau fragment in complex with other proteins | Tau fragment in complex with Fab            | 7.0  | 0.0 | 0.0 | 0.0 | 100.0 | 0.0 | HIS299 | SER305 |
| 5MP5 (chains EFI) | Tau fragment in complex with other proteins | Tau fragment in complex with Fab            | 7.0  | 0.0 | 0.0 | 0.0 | 100.0 | 0.0 | HIS299 | SER305 |
| 5MP5 (chains HJL) | Tau fragment in complex with other proteins | Tau fragment in complex with Fab            | 7.0  | 0.0 | 0.0 | 0.0 | 100.0 | 0.0 | HIS299 | SER305 |
| 6BB4 (chains HLP) | Tau fragment in complex with other proteins | Tau fragment in complex with Fab            | 7.0  | 0.0 | 0.0 | 0.0 | 100.0 | 0.0 | ILE392 | VAL398 |
| 6BB4 (chains IMQ) | Tau fragment in complex with other proteins | Tau fragment in complex with Fab            | 7.0  | 0.0 | 0.0 | 0.0 | 100.0 | 0.0 | ILE392 | VAL398 |
| 6BB4 (chains JNR) | Tau fragment in complex with other proteins | Tau fragment in complex with Fab            | 7.0  | 0.0 | 0.0 | 0.0 | 100.0 | 0.0 | ILE392 | VAL398 |
| 6DC8              | Tau fragment in complex with other proteins | Tau fragment in complex with Fab            | 5.0  | 0.0 | 0.0 | 0.0 | 100.0 | 0.0 | SER404 | LEU408 |
| 6DC9 (chains HLP) | Tau fragment in complex with other proteins | Tau fragment in complex with Fab            | 6.0  | 0.0 | 0.0 | 0.0 | 100.0 | 0.0 | THR403 | LEU408 |
| 6DC9 (chains IMQ) | Tau fragment in complex with other proteins | Tau fragment in complex with Fab            | 6.0  | 0.0 | 0.0 | 0.0 | 100.0 | 0.0 | THR403 | LEU408 |
| 6DCA (chains HLP) | Tau fragment in complex with other proteins | Tau fragment in complex with Fab            | 6.0  | 0.0 | 0.0 | 0.0 | 100.0 | 0.0 | THR403 | LEU408 |
| 6DCA (chains IMQ) | Tau fragment in complex with other proteins | Tau fragment in complex with Fab            | 6.0  | 0.0 | 0.0 | 0.0 | 100.0 | 0.0 | THR403 | LEU408 |
| 6DCA (chains JNR) | Tau fragment in complex with other proteins | Tau fragment in complex with Fab            | 6.0  | 0.0 | 0.0 | 0.0 | 100.0 | 0.0 | THR403 | LEU408 |
| 6LRA              | Tau fragment in complex with other proteins | Tau fragment in complex with Fab            | 6.0  | 0.0 | 0.0 | 0.0 | 100.0 | 0.0 | VAL1   | LYS6   |
| 6PXR              | Tau fragment in complex with other proteins | Tau fragment in complex with Fab            | 8.0  | 0.0 | 0.0 | 0.0 | 100.0 | 0.0 | ALA15  | ASP22  |
| 6XLI (chains ABE) | Tau fragment in complex with other proteins | Tau fragment in complex with Fab            | 23.0 | 0.0 | 0.0 | 0.0 | 100.0 | 0.0 | SER210 | GLU222 |
| 6XLI (chains CDF) | Tau fragment in complex with other proteins | Tau fragment in complex with Fab            | 23.0 | 0.0 | 0.0 | 0.0 | 100.0 | 0.0 | SER210 | GLU222 |
| 6XLI (chains HLP) | Tau fragment in complex with other proteins | Tau fragment in complex with Fab            | 23.0 | 0.0 | 0.0 | 0.0 | 100.0 | 0.0 | SER210 | GLU222 |
| 6H06 (chains ABK) | Tau fragment in complex with other proteins | Tau fragment in complex with FAB CBTAU-22.1 | 7.0  | 0.0 | 0.0 | 0.0 | 100.0 | 0.0 | VAL420 | ALA426 |
| 6H06 (chains CDG) | Tau fragment in complex with other proteins | Tau fragment in complex with FAB CBTAU-22.1 | 7.0  | 0.0 | 0.0 | 0.0 | 100.0 | 0.0 | VAL420 | ALA426 |

|                   |                                             |                                             |      |      |     |      |       |      |        |        |
|-------------------|---------------------------------------------|---------------------------------------------|------|------|-----|------|-------|------|--------|--------|
| 6H06 (chains EFJ) | Tau fragment in complex with other proteins | Tau fragment in complex with FAB CBTAU-22.1 | 7.0  | 0.0  | 0.0 | 0.0  | 100.0 | 0.0  | VAL420 | ALA426 |
| 6H06 (chains HIL) | Tau fragment in complex with other proteins | Tau fragment in complex with FAB CBTAU-22.1 | 7.0  | 0.0  | 0.0 | 0.0  | 100.0 | 0.0  | VAL420 | ALA426 |
| 1I8H              | Tau fragment in complex with other proteins | Tau fragment in complex with Pin1 WW domain | 13.0 | 15.4 | 0.0 | 0.0  | 84.6  | 0.0  | LYS1   | SER13  |
| 7SP1              | Tau fragment in complex with other proteins | Tau fragment in complex with RNA            | 36.0 | 8.3  | 0.0 | 0.0  | 38.9  | 80.9 | GLU391 | ALA426 |
| 5V5B              | Tau fragment                                | Tau fragment KVQIINKKL                      | 10.0 | 0.0  | 0.0 | 0.0  | 100.0 | 0.0  | LYS274 | ASP283 |
| 6NK4              | Tau fragment                                | Tau fragment KVQIINKKL                      | 9.0  | 0.0  | 0.0 | 0.0  | 100.0 | 22.2 | LYS1   | LEU9   |
| 6N4P              | Tau fragment                                | Tau fragment RQEFEV                         | 6.0  | 0.0  | 0.0 | 50.0 | 50.0  | 58.4 | ARG1   | VAL6   |
| 6ODG              | Tau fragment                                | Tau fragment SVQIVY                         | 6.0  | 0.0  | 0.0 | 0.0  | 100.0 | 0.0  | SER1   | TYR6   |
| 4E0M              | Tau fragment                                | Tau fragment SVQIVYK                        | 13.0 | 0.0  | 0.0 | 23.1 | 76.9  | 84.6 | SER1   | LYS13  |
| 4E0N              | Tau fragment                                | Tau fragment SVQIVYK                        | 13.0 | 0.0  | 0.0 | 23.1 | 76.9  | 84.6 | SER1   | LYS13  |
| 4E0O              | Tau fragment                                | Tau fragment SVQIVYK                        | 13.0 | 0.0  | 0.0 | 23.1 | 76.9  | 84.6 | SER1   | LYS13  |
| 5V5C              | Tau fragment                                | Tau fragment VQIINK                         | 6.0  | 0.0  | 0.0 | 0.0  | 100.0 | 0.0  | VAL275 | LYS280 |
| 2ON9              | Tau fragment                                | Tau fragment VQIVYK                         | 6.0  | 0.0  | 0.0 | 0.0  | 100.0 | 0.0  | VAL1   | LYS6   |
| 3OVL              | Tau fragment                                | Tau fragment VQIVYK                         | 6.0  | 0.0  | 0.0 | 0.0  | 100.0 | 16.7 | VAL1   | LYS6   |
| 4NP8              | Tau fragment                                | Tau fragment VQIVYK                         | 6.0  | 0.0  | 0.0 | 0.0  | 100.0 | 0.0  | VAL1   | LYS6   |
| 5K7N              | Tau fragment                                | Tau fragment VQIVYK                         | 6.0  | 0.0  | 0.0 | 0.0  | 100.0 | 0.0  | VAL1   | LYS6   |
